# Supplementary material
Source: Springer Nature journal article supplement (https://www.springermedizin.de/resource/supplementary/12885_2010_2712_MOESM3_ESM.pdf/9461772)

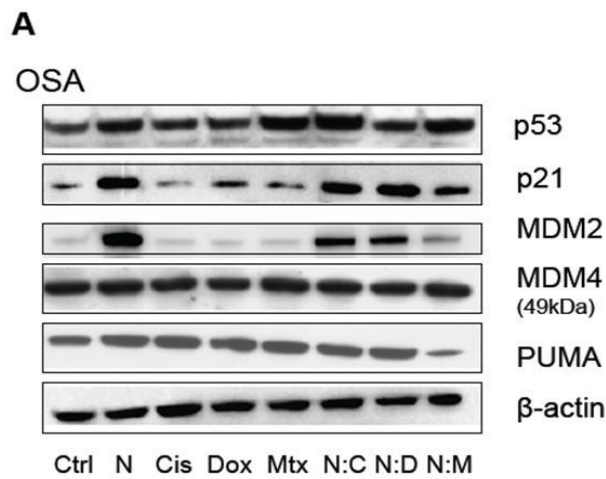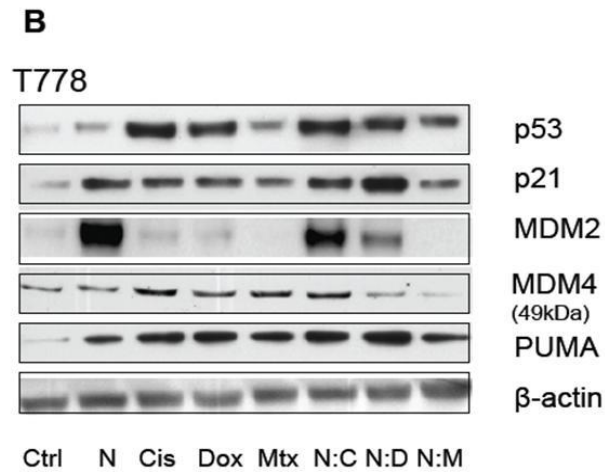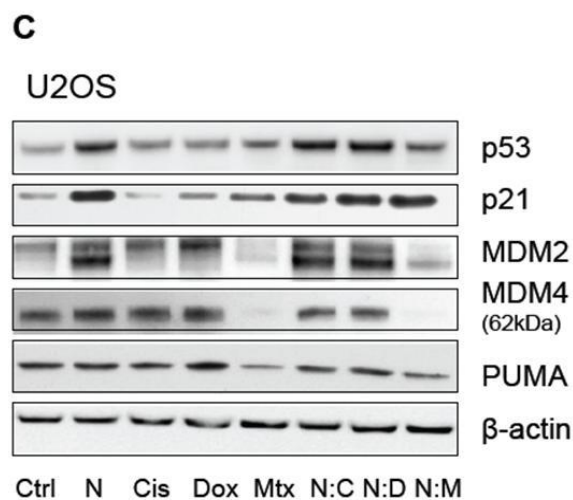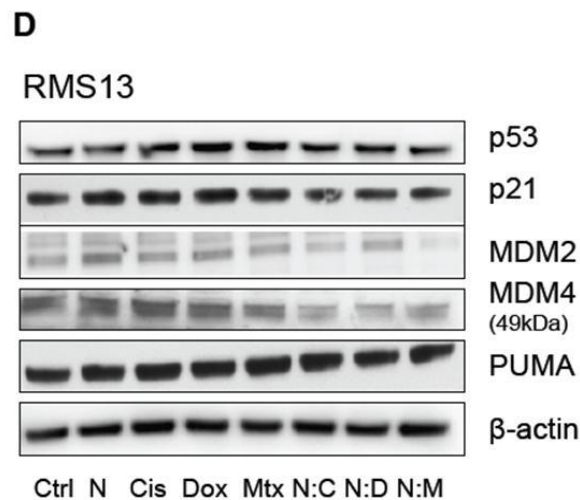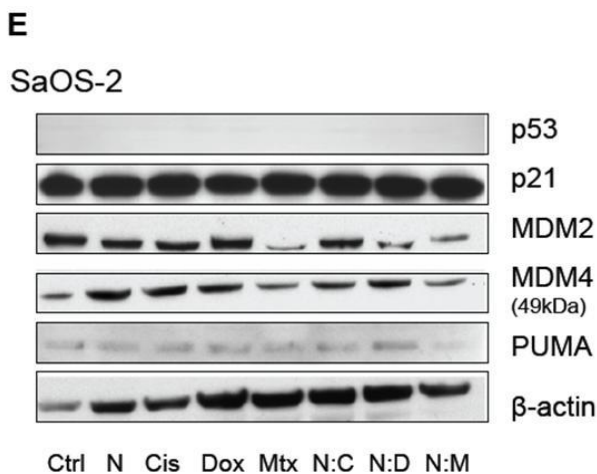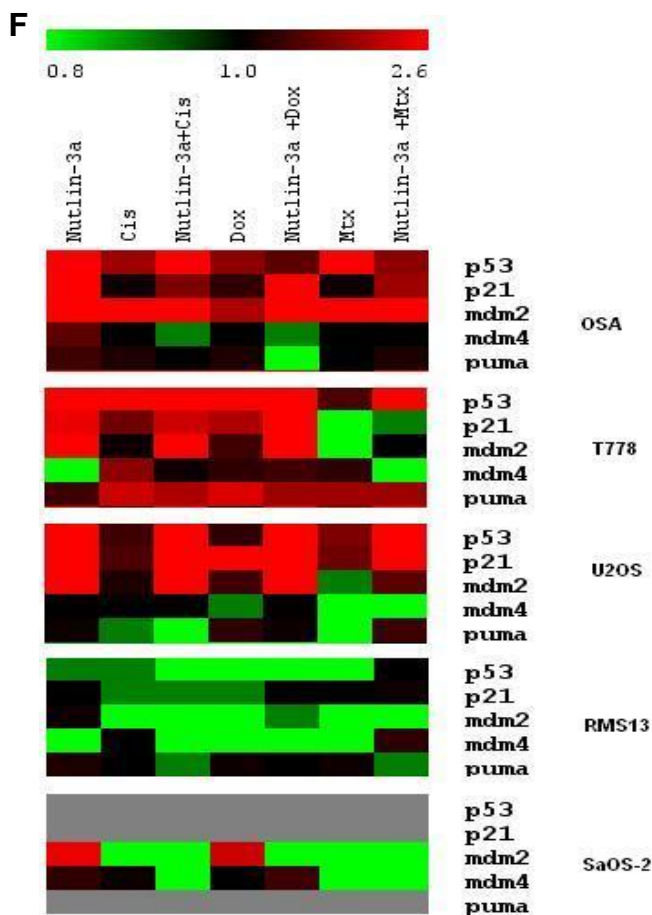

Supplement: MOESM3 [file 9461772]
